# Supplementary material
Source: Springer Nature journal article supplement (https://www.springermedizin.de/resource/supplementary/13229_2013_165_MOESM6_ESM.pdf/9676160)

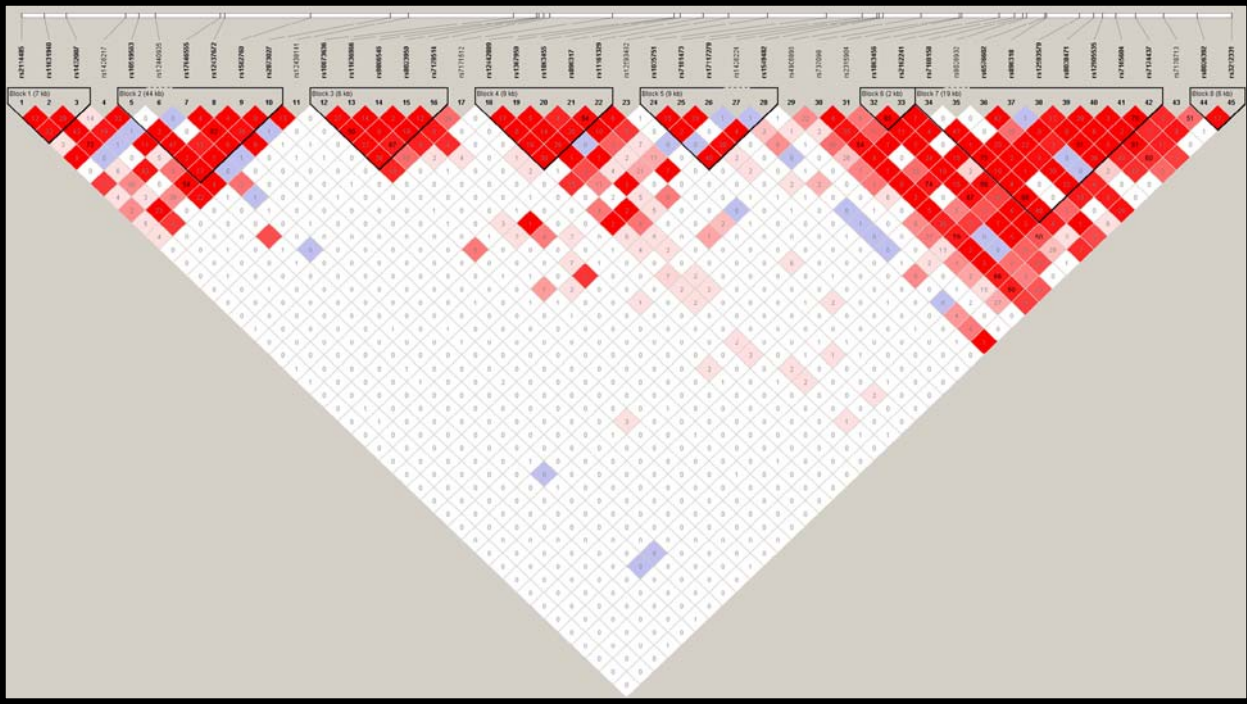

Supplement: MOESM6 [file 9676160]
